# Supplementary material for: Tumor microenvironment defines the invasive phenotype of AIP-mutation-positive pituitary tumors
Source: PubMed Central journal article supplement (PMC6755983; doi:10.1038/s41388-019-0779-5), 2019-03-12

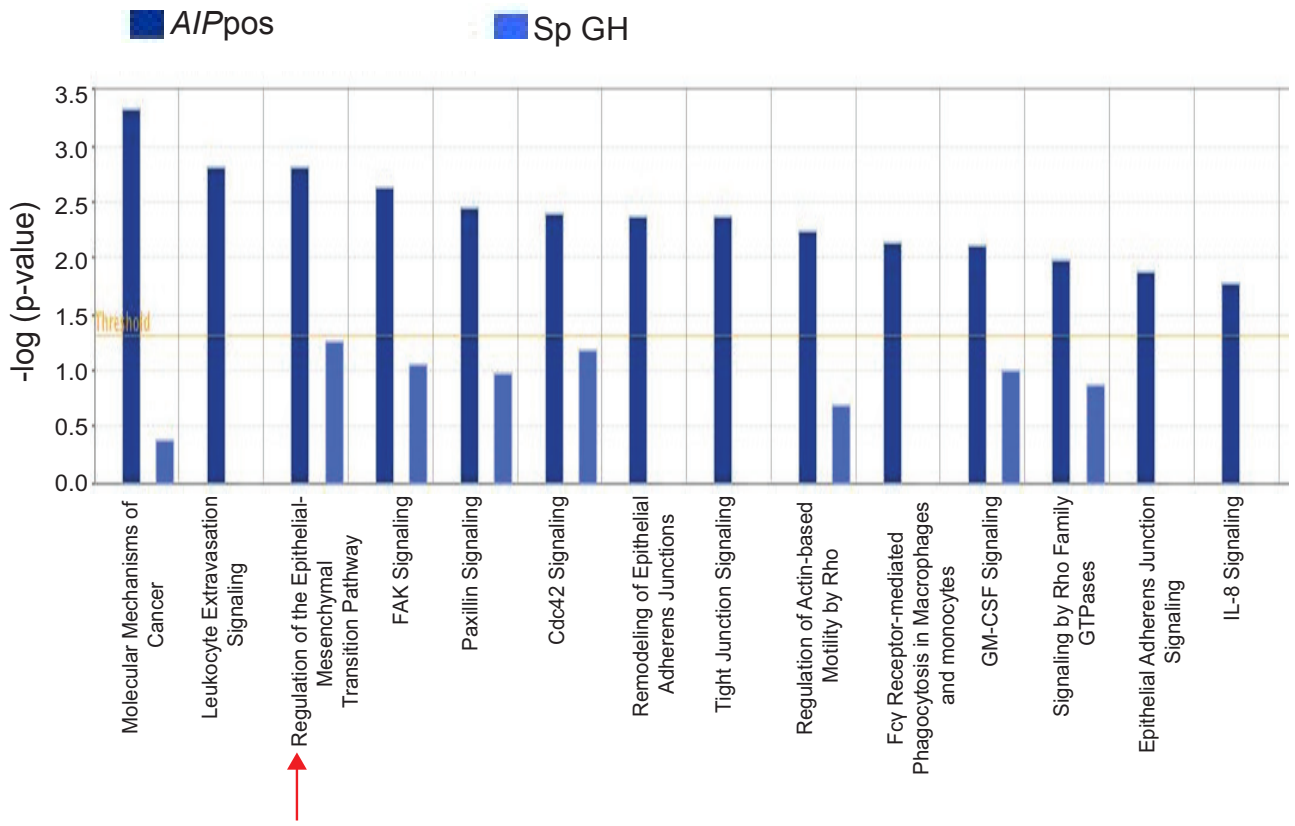

Supplement: 41388_2019_779_MOESM3_ESM.pdf [file 41388_2019_779_MOESM3_ESM.pdf]
